# Supplementary material for: Enhancing pressure consistency and transferability of structure-based coarse-graining
Source: Royal Society of Chemistry journal article supplement (doi:10.1039/d2cp04849c), 2022-12-21
Supplement: d2cp04849c1.pdf [file d2cp04849c1.pdf]

Supplementary Information

## Enhancing pressure consistency and transferability of structure-based coarse-graining

Jiahao Tang,<sup>a</sup> Takayuki Kobayashi,<sup>b</sup> Hedong Zhang,<sup>\*a</sup> Kenji Fukuzawa<sup>b</sup> and Shintaro Itoh<sup>b</sup>

<sup>a</sup> Department of Complex Systems Science, Graduate School of Informatics, Nagoya University,  
Furo-cho, Chikusa-ku, Nagoya 464-8601, Japan

<sup>b</sup> Department of Micro-Nano Systems Engineering, Graduate School of Engineering, Nagoya  
University, Furo-cho, Chikusa-ku, Nagoya 464-8603, Japan

\* Corresponding Author. E-mail: zhang@i.nagoya-u.ac.jp

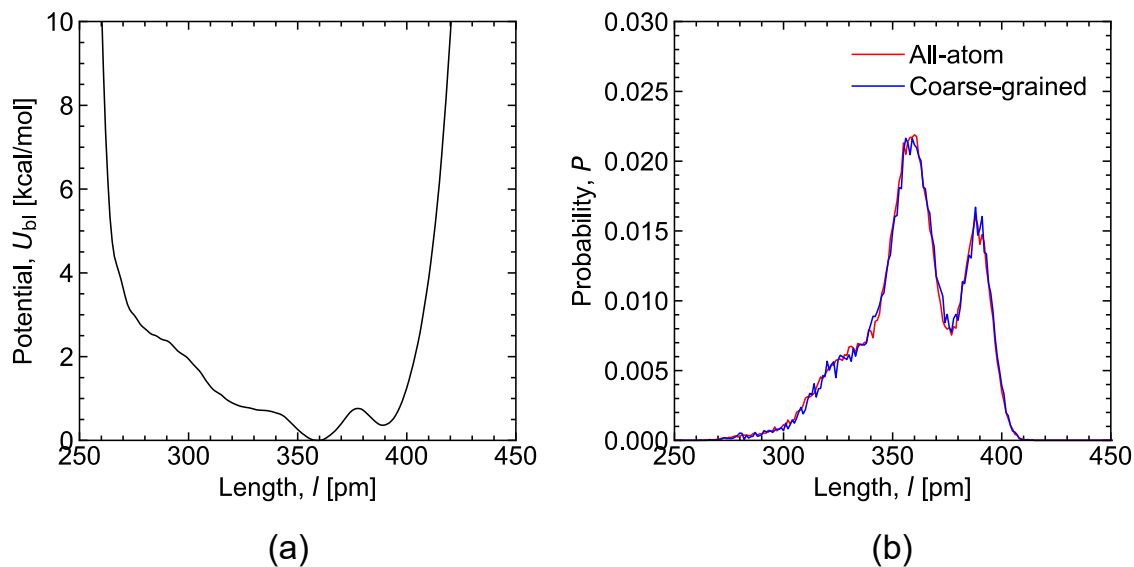

**Fig. S1** (a) Coarse-grained bond-length potential. (b) Distribution functions of bond length calculated from simulations of bulk *n*-dodecane systems with the all-atom and our coarse-grained model.

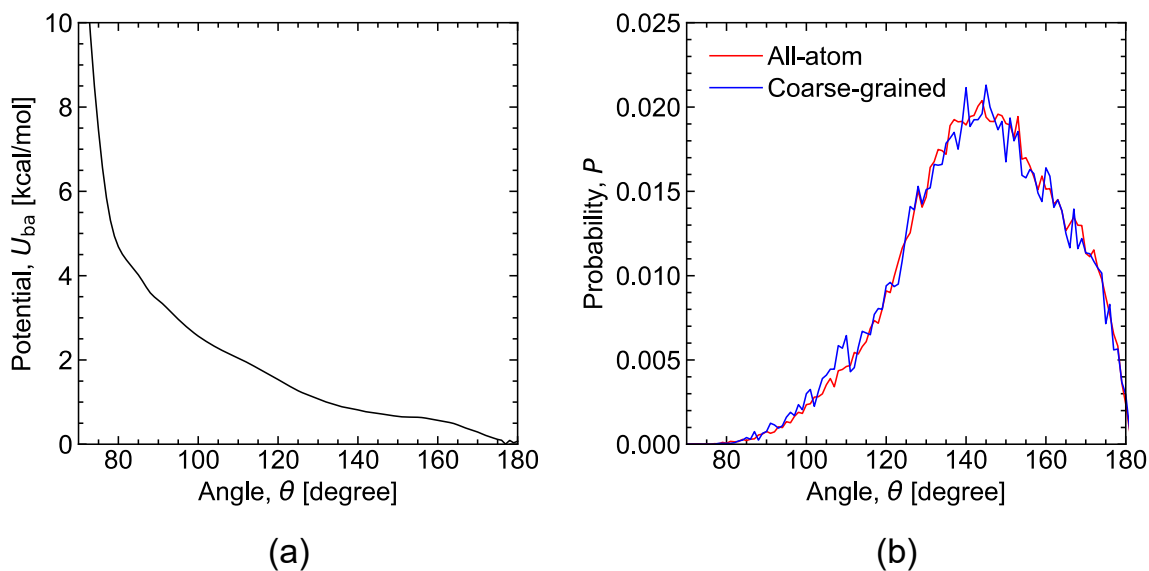

**Fig. S2** (a) Coarse-grained bond-angle potential. (b) Distribution functions of bond angle calculated from simulations of bulk *n*-dodecane systems with the all-atom and our coarse-grained model.

**Table. S1** Values of parameters  $A$ ,  $B$ ,  $C$ ,  $a$ ,  $b$ ,  $c$ , and  $d$  in eqn (18) for the two initial potentials n-mRDF and n-uRDF, which used the modified and unmodified reference RDFs at 0.1 MPa. Note that the units of  $r$  and  $U_{nb}^0$  in eqn (18) are Å and kcal/mol, respectively.

|        | $A$                | $B$  | $a$    | $b$  | $c$   | $d$  | $C$ (J · m <sup>6</sup> ) |
|--------|--------------------|------|--------|------|-------|------|---------------------------|
| n-mRDF | $1.05 \times 10^5$ | 7.25 | -0.031 | 0.63 | -4.20 | 8.79 | $5.7 \times 10^{-77}$     |
| n-uRDF | $8.49 \times 10^5$ | 9.50 | -0.024 | 0.48 | -3.03 | 5.98 |                           |
